# Supplementary material
Source: PubMed Central journal article supplement (PMC34698)
Supplement: pnas_131216298_2.pdf [file pnas_131216298_2.pdf]

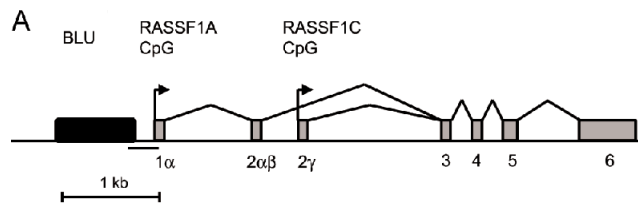

**B**

GTAGGTTAA GTGTGTGTT  
 17651 AAGGCTCGAG ACTTCCTGCC CCACCCAGTG GGTAGGCCAA GTGTGTGCT  
 TTAGTA ▶  
 17701 TCAGCAAACC GGACCAGCAG GGCCAGGGCC GGATGTGGG ACCCTCTTC  
 AGTATAG TAAAGTTGGT TTTT AGAAAT A ▶ BstUI  
 17751 TCTAGCACAG TAAAGCTGCC CTCCAGAA ACgGGTATCT CCgCgTGGTG  
 MspI  
 17801 CTTTGCgGTC gCCgTCgTTG TGGCCgTCCg GGGTGGGGTG TGAGGAGGGG  
 BstUI  
 17851 ACgAAGGAGG GAAGGAAGGG CAAGGCgGGG GGGGCTCTGC gAGAGCgCgC  
 BstUI  
 17901 CCAGCCCCgC CTTcGGCCCC CACAGTCCCT GCACCCAGGT TTCCATTGCg  
 BstUI  
 17951 CgGCTCTCCT CAGCTCCTC CCgCCgCCCA GTCTGGATCC TGGGGGAGGC  
 MspI BstUI  
 18001 gCTGAAgTcG GGGCCCgCCC TGTGGCCCCg CCCgGCCcGc gCTTGCTAGC  
 18051 gCCCAAAGCC AGCgAAGCAC gGGCCCAACC gGGCCATGTC gGGGGAGCCT  
 A  
 18101 GAGCTCATTG AGCTGCGGGA GCTGGCACCC GCTGGGCGCG CTGGGAAGGG  
 CTCAAATAAC TCAACRCCCT CAACCATAA  
 18151 CCGCACCCGG CTGGAGCGTG CCAACGGCT GCGCATCGCG CGGGGCACCG
