# Supplementary material
Source: PubMed Central journal article supplement (PMC34698)

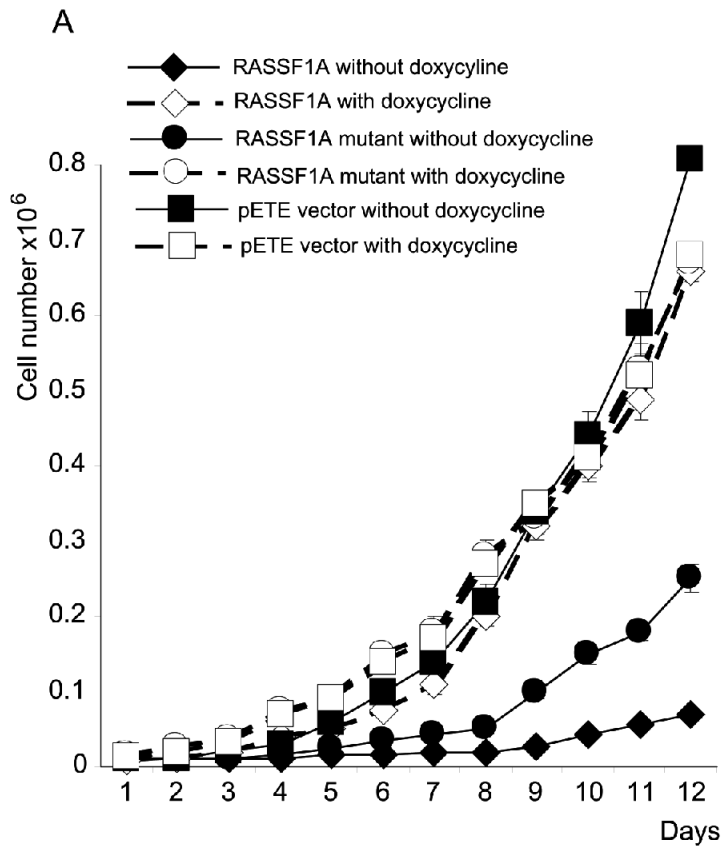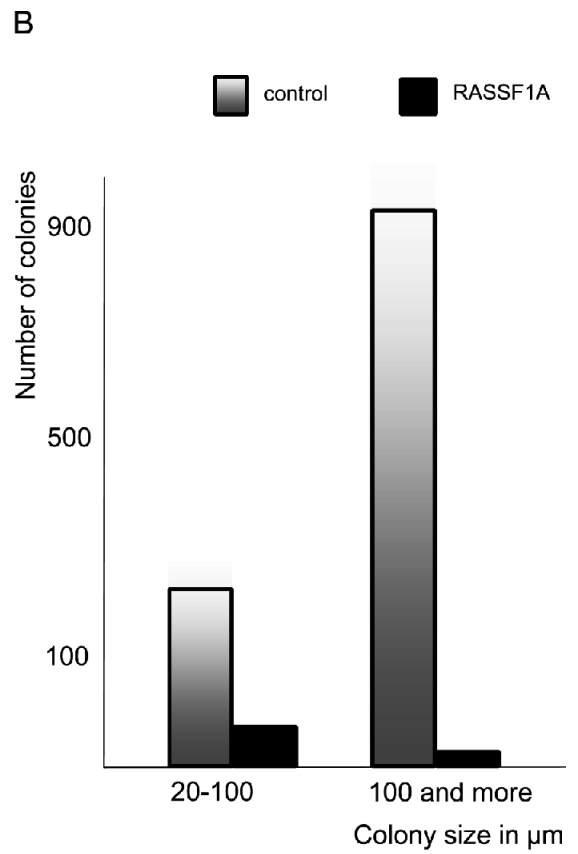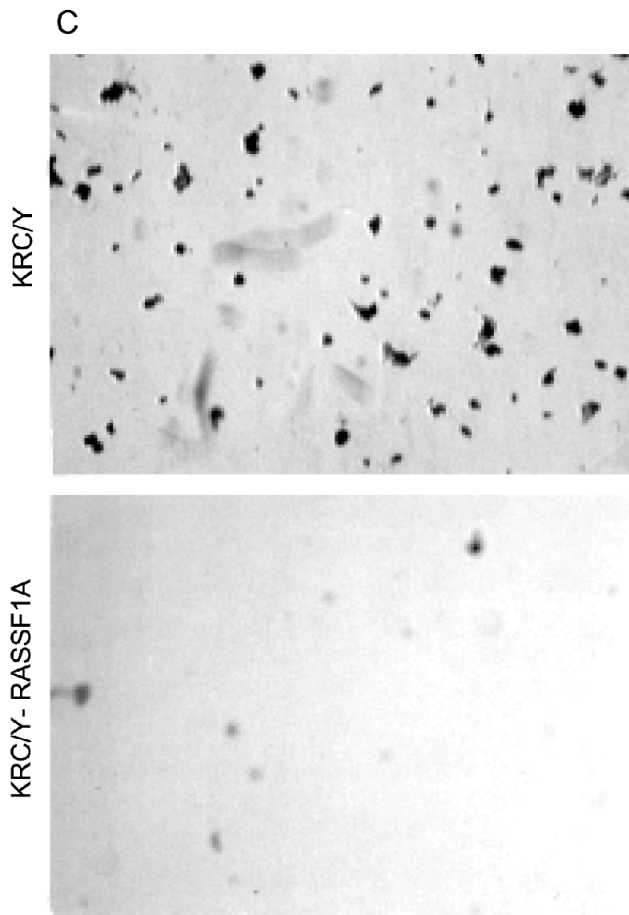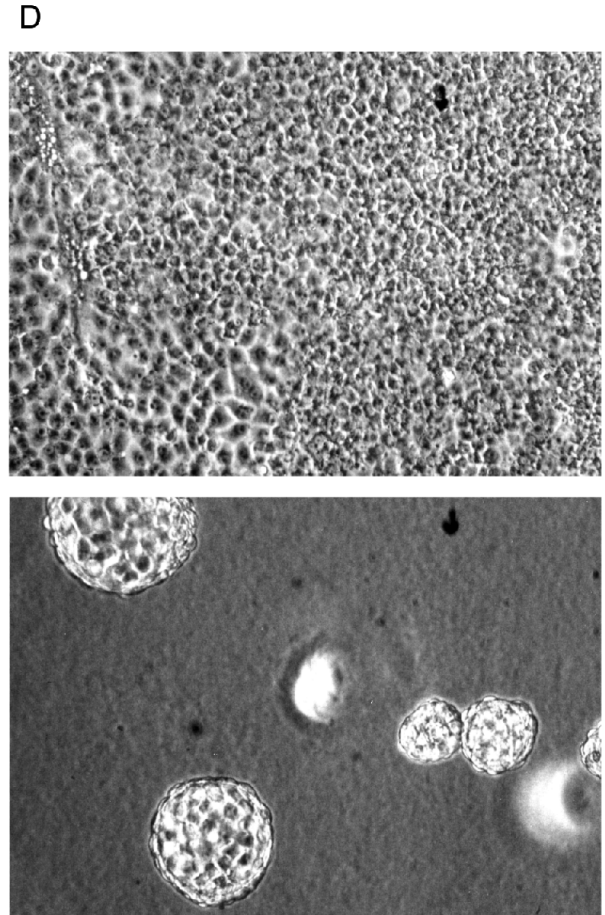

Supplement: pnas_131216298_8.pdf [file pnas_131216298_8.pdf]
